# Supplementary material for: Unusual formation of tetragonal microstructures from nitrogen-doped carbon nanocapsules with cobalt nanocores as a bi-functional oxygen electrocatalyst
Source: Royal Society of Chemistry journal article supplement (doi:10.1039/c6ta09943b), 2016-12-28
Supplement: c6ta09943b1.pdf [file c6ta09943b1.pdf]

## Electronic Supplementary Information

# **Unusual Formation of Tetragonal Microstructure from Nitrogen-Doped Carbon Nanocapsules with Cobalt Nanocores as a Bi-Functional Oxygen Electrocatalyst**

**Enlai Hu,<sup>b,1</sup> Jiqiang Ning,<sup>c,1</sup> Bin He,<sup>b</sup> Zhipeng Li,<sup>b</sup> Changcheng Zheng,<sup>d</sup> Yijun Zhong,<sup>a</sup> Ziyang Zhang,<sup>c</sup> Yong Hu<sup>\*ab</sup>**

<sup>a</sup>Hangzhou Institute of Advanced Studies, Zhejiang Normal University, Hangzhou 311231, China.

<sup>b</sup>Institute of Physical Chemistry, Zhejiang Normal University, Jinhua 321004, China.

<sup>c</sup>Vacuum Interconnected Nanotech Workstation, Suzhou Institute of Nano-Tech and Nano-Bionics, Chinese Academy of Sciences, Suzhou 215123, China.

<sup>d</sup>Mathematics and Physics Centre, Department of Mathematical Sciences, Xi'an Jiaotong-Liverpool University, Suzhou 215123, China.

\*Corresponding author. Y. Hu. email: [yonghu@zjnu.edu.cn](mailto:yonghu@zjnu.edu.cn).

<sup>1</sup>These authors contributed equally to this work.

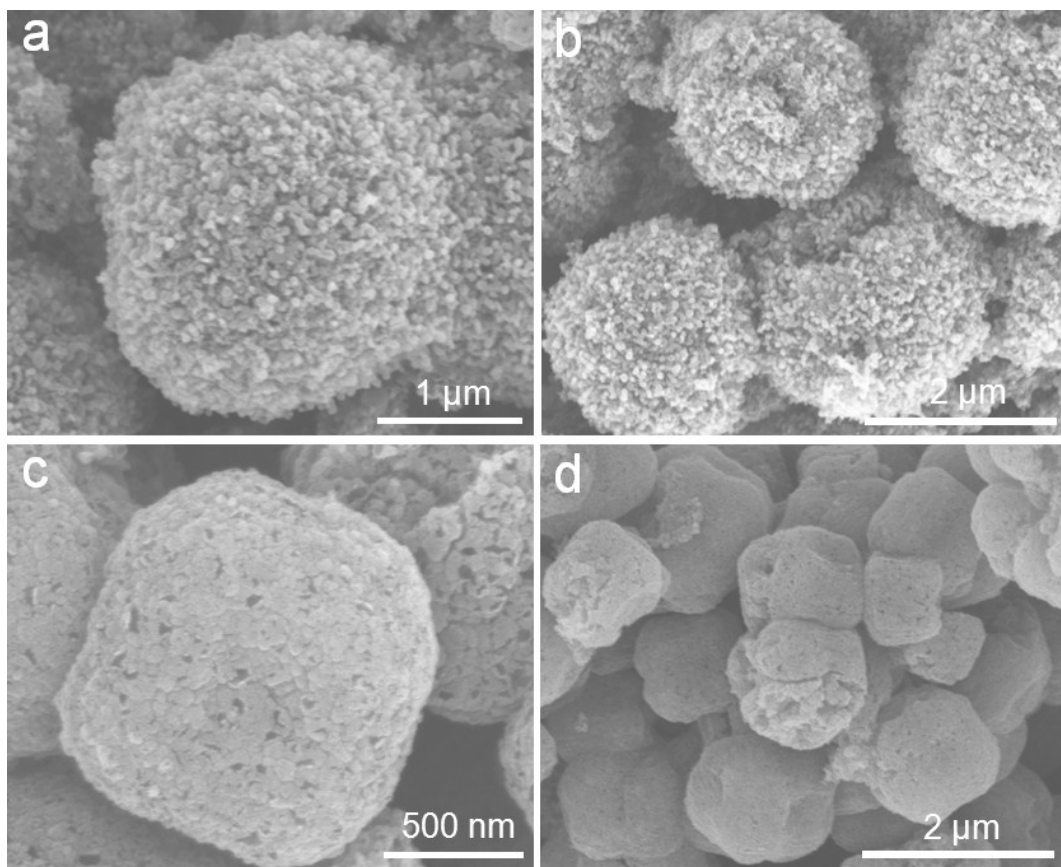

**Fig. S1** SEM images of the as-prepared samples: (a) and (b) Co-N-C-0.1. (c) and (d) Co-N-C-0.6.

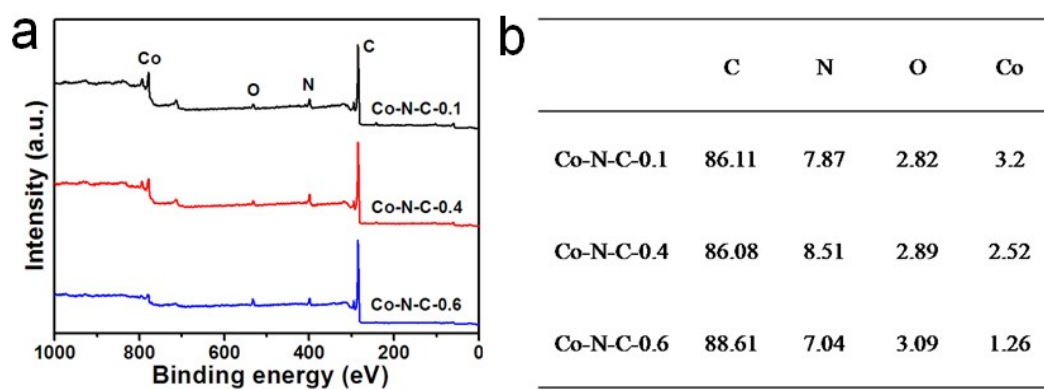

**Fig. S2** XPS analysis results of the as-prepared samples: **(a)** XPS spectra. **(b)** Elemental composition (atomic percentage) obtained from XPS analysis.

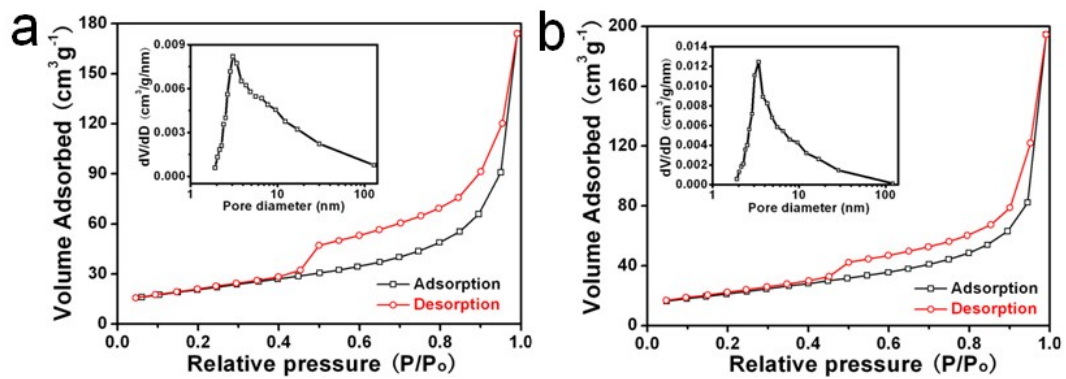

**Fig. S3** N<sub>2</sub> adsorption-desorption isotherms of the as-prepared samples: (a) Co-N-C-0.1, (b) Co-N-C-0.6.

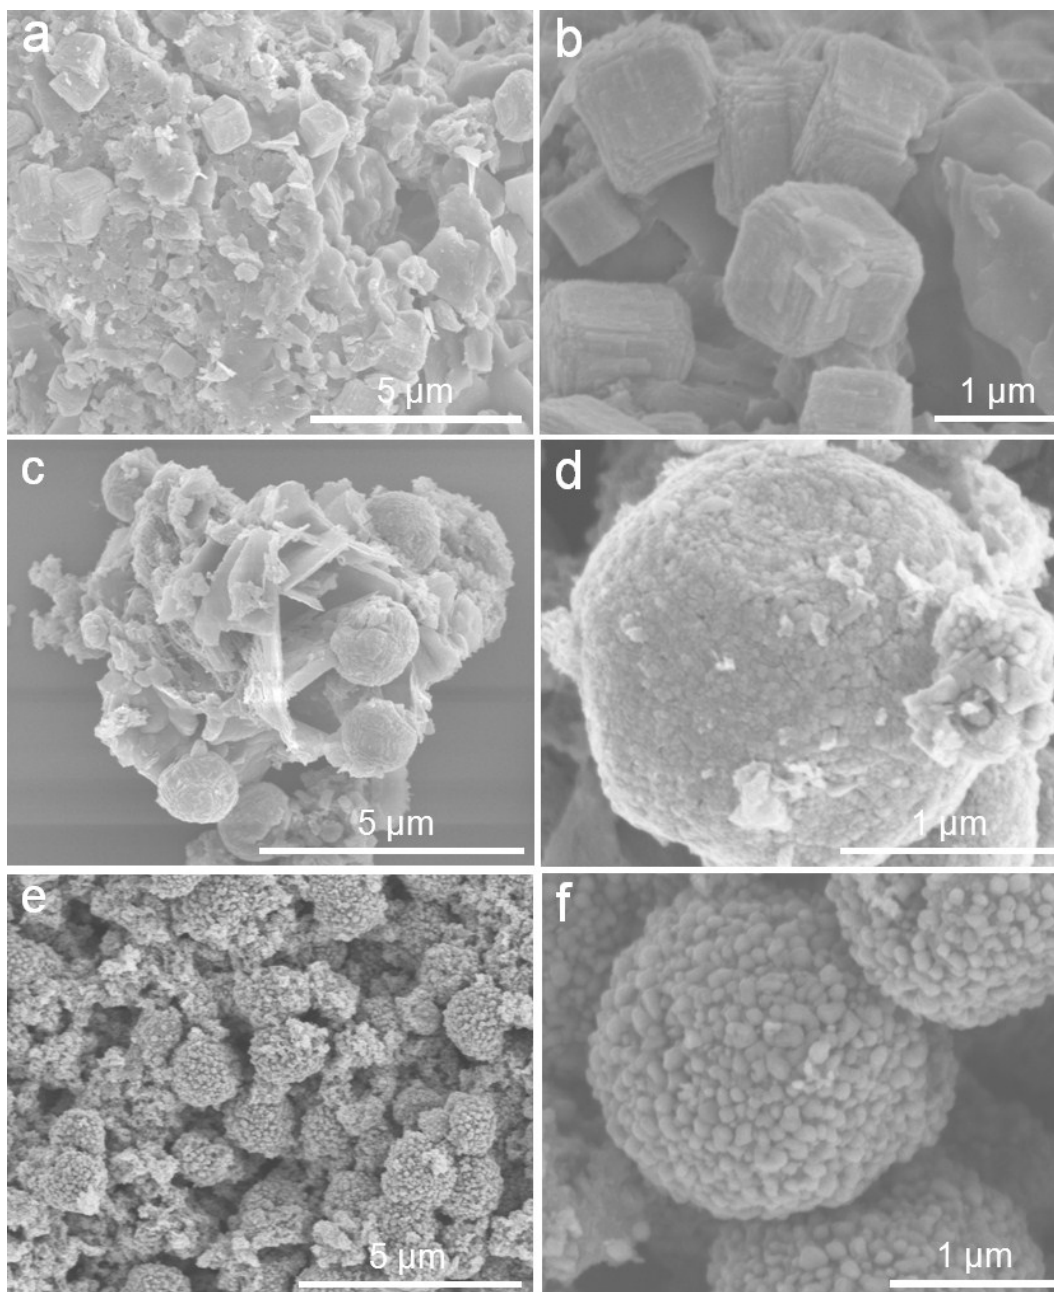

**Fig. S4** SEM images of the as-prepared sample Co-N-C-0.4 after annealing at different temperatures: (a) and (b) at 300 °C. (c) and (d) at 400 °C. (e) and (f) at 500 °C.

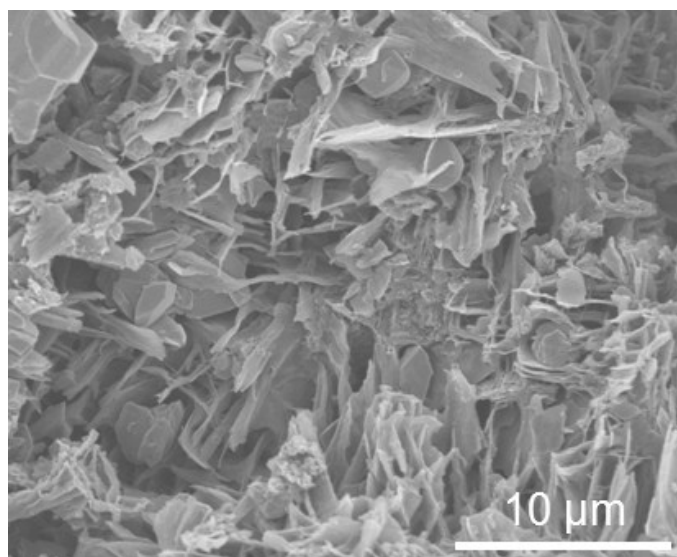

**Fig. S5** SEM image of the as-prepared g-C<sub>3</sub>N<sub>4</sub>.

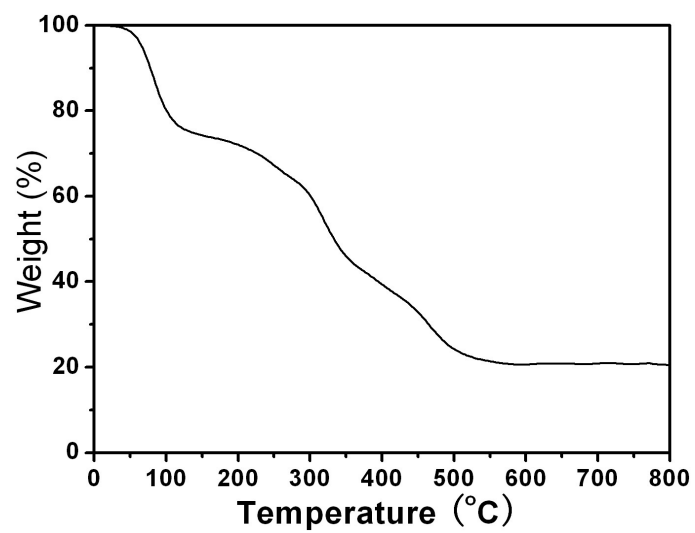

**Fig. S6** TGA curve of the mixture of 0.1 g g-C<sub>3</sub>N<sub>4</sub> and 0.4 g Co(CH<sub>3</sub>COO)<sub>2</sub>•4H<sub>2</sub>O.

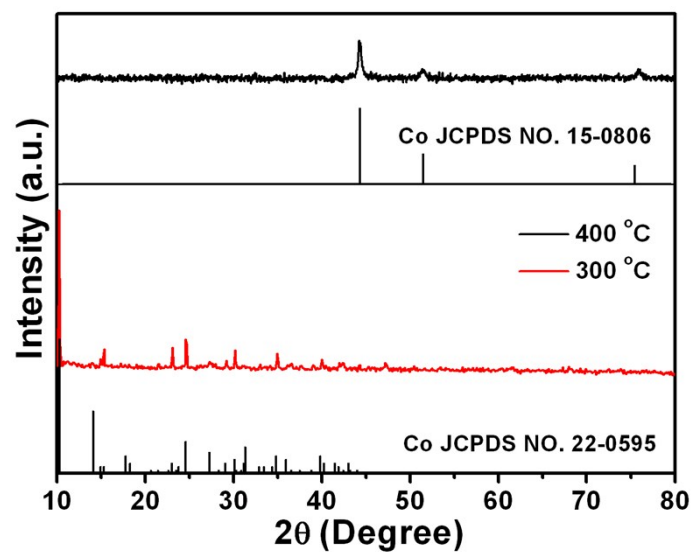

Fig. S7 XRD patterns of the Co-N-C-0.4 obtained at different temperature.



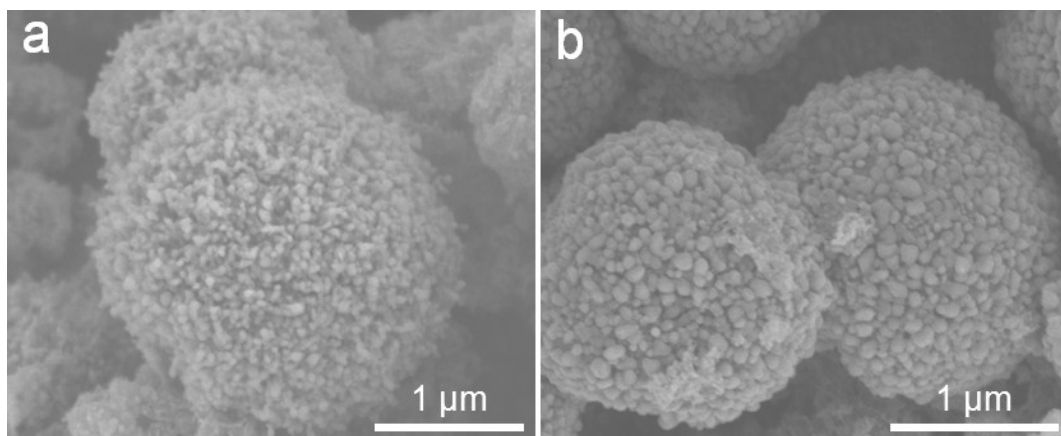

**Fig. S8** SEM images of the as-prepared samples: (a) Co-N-C-0.1. (b) Co-N-C-0.4 without acid leaching treatment.

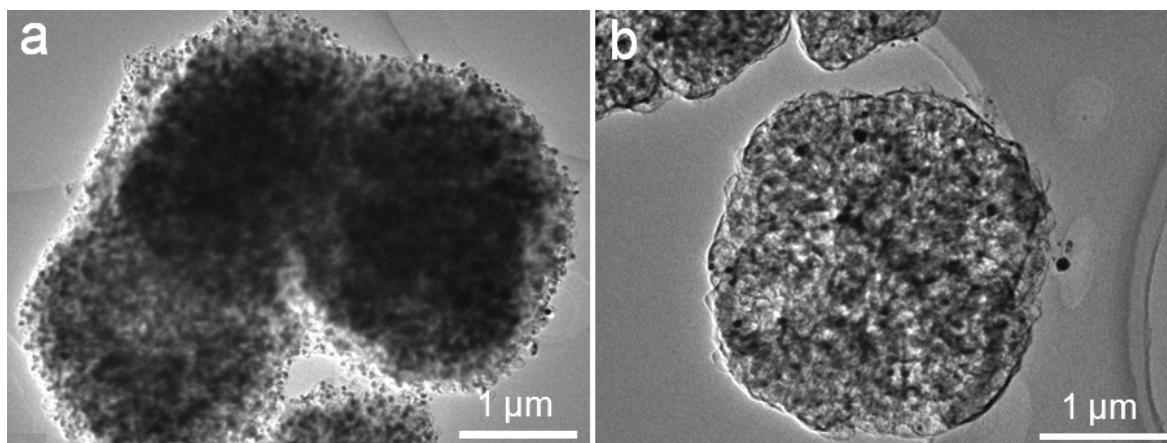

**Fig. S9** TEM images of the as-prepared samples: (a) Co-N-C-0.1. (b) Co-N-C-0.6.

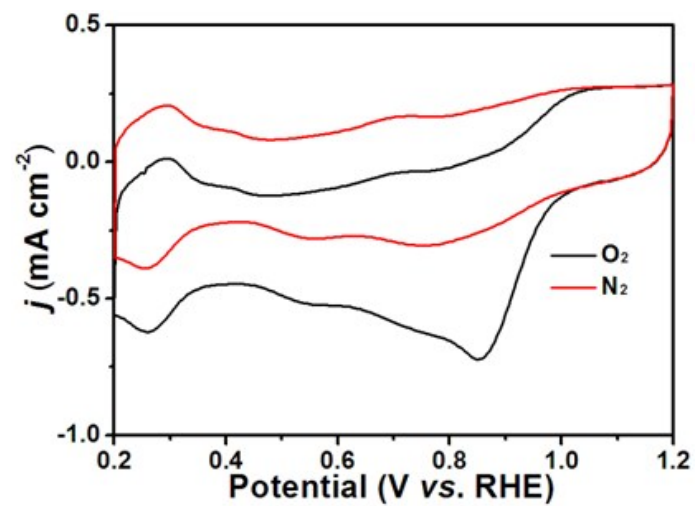

**Fig. S10** CV profiles of the Pt/C in O<sub>2</sub>(black curve) and N<sub>2</sub> (red curve) saturated 0.1 M KOH solution at 1600 rpm with a scan rate of 20 mV s<sup>-1</sup>.

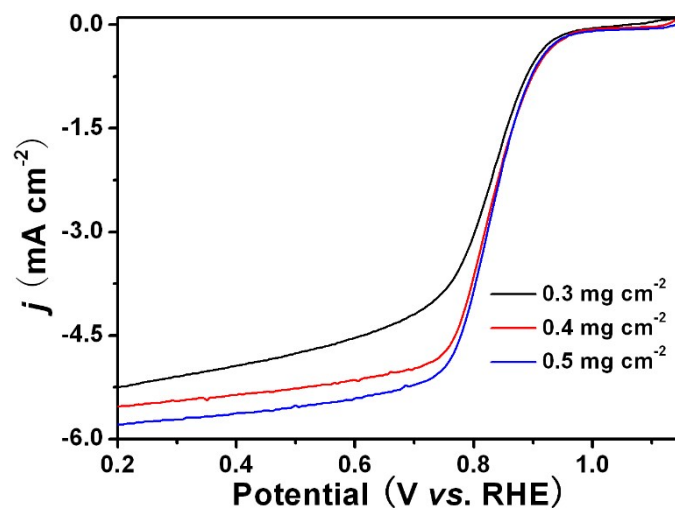

**Fig. S11** LSV results of the as-prepared Co-N-C-0.4 catalyst with different loading amount. (in O<sub>2</sub> saturated 0.1 M KOH solution at a rotation rate of 1600 rpm)

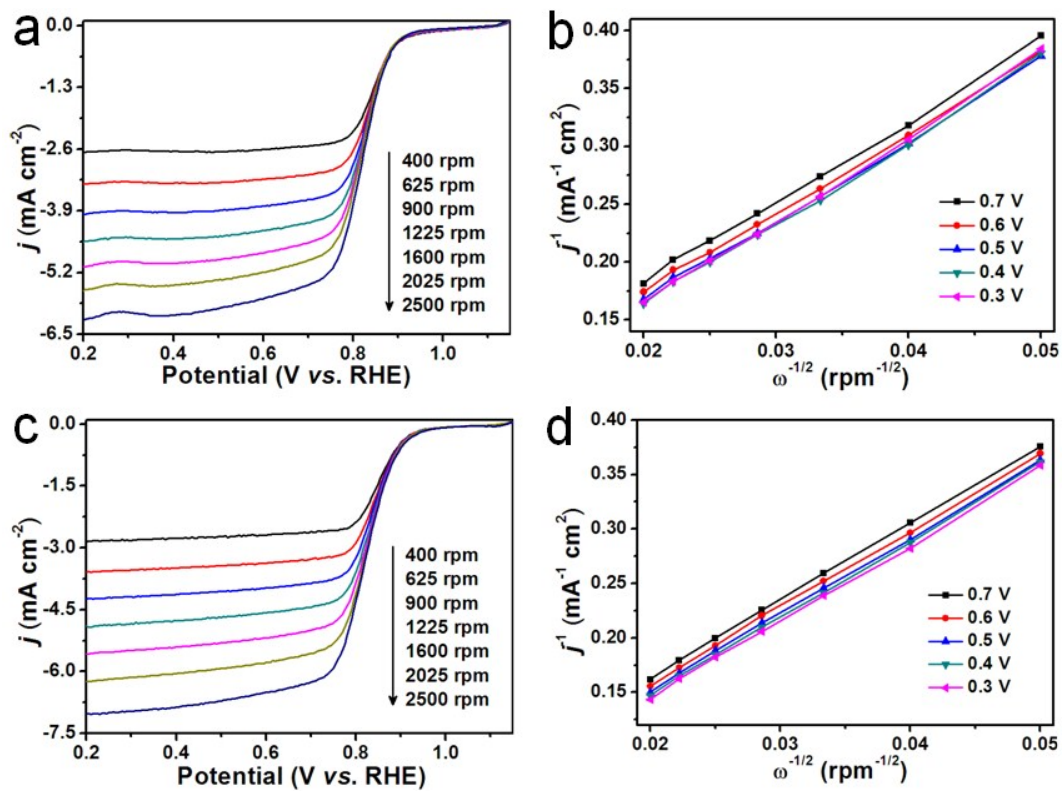

**Fig. S12** (a) and (c) LSV results of Co-N-C-0.1 (a) and Co-N-C-0.6 (c) at different rotation rates. (b) and (d) the corresponding K-L plots.

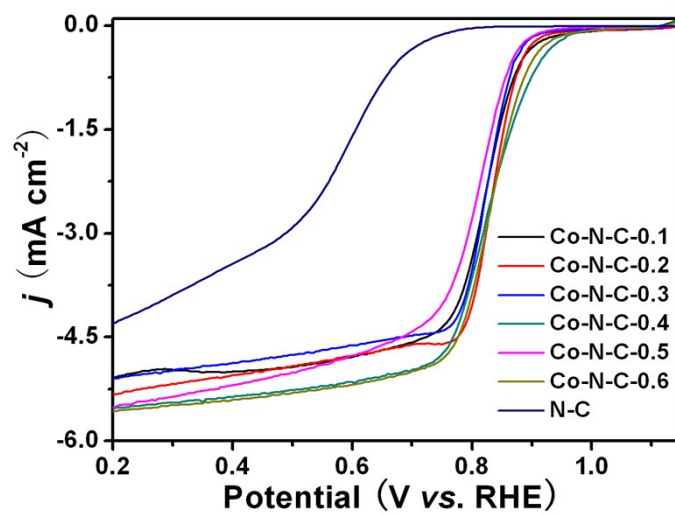

**Fig. S13** LSV results of the as-prepared samples. (in O<sub>2</sub> saturated 0.1 M KOH solution at a rotation rate of 1600 rpm)

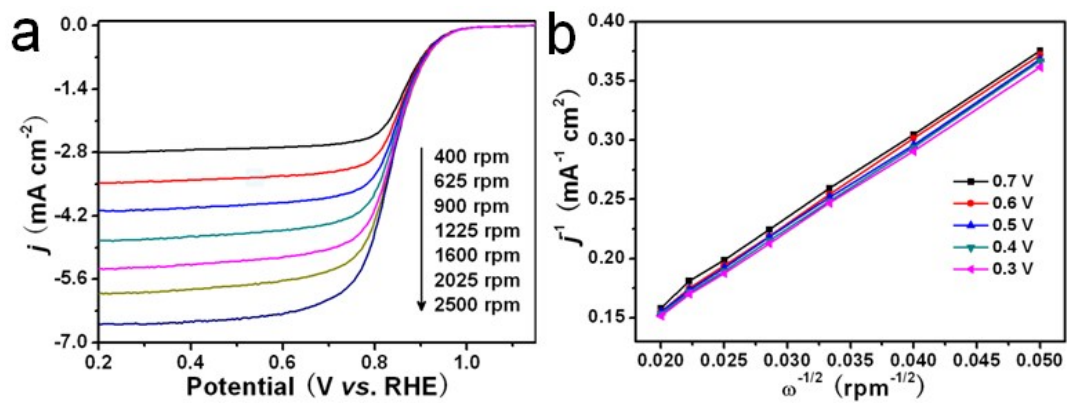

**Fig. S14** (a) LSV results of the commercial Pt/C at different rotation rates. (b) corresponding K-L plots.

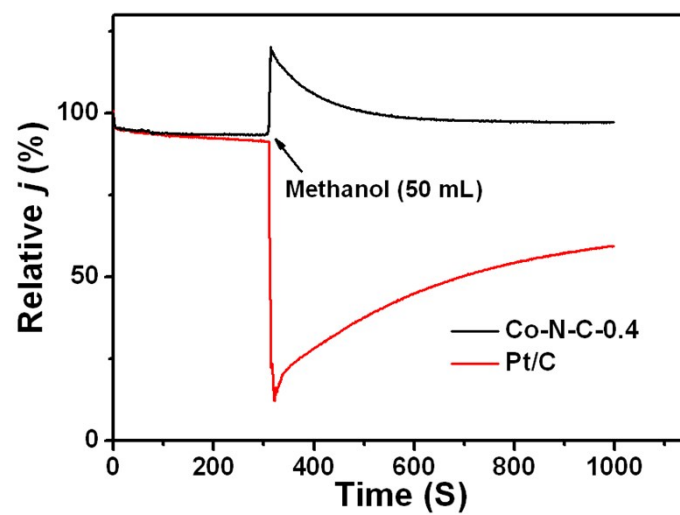

**Fig. S15** Chronoamperometric response at 0.6 V in  $O_2$  saturated 0.1 M KOH solution with the adding of 50 ml methanol.



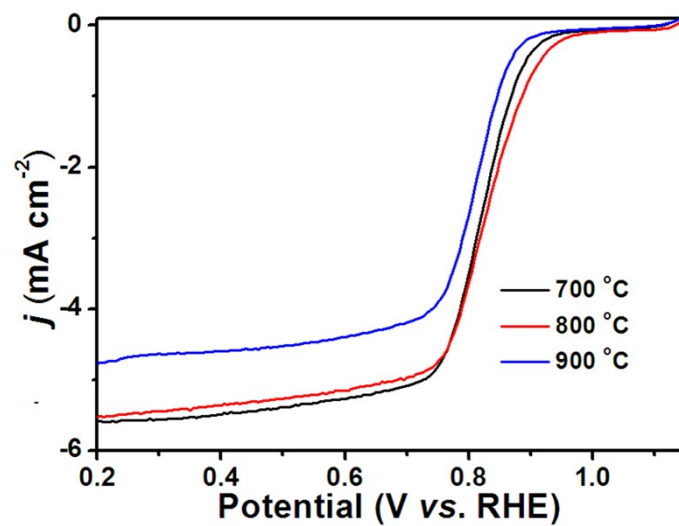

**Fig. S16** LSV curves of the as-prepared Co-N-C-0.4 obtained at different temperatures. (in O<sub>2</sub> saturated 0.1 M KOH solution at a rotation rate of 1600 rpm).

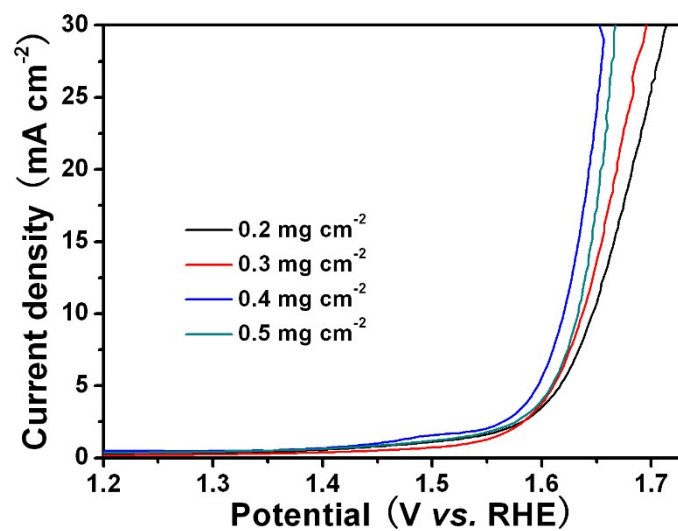

**Fig. S17** LSV results of the as-prepared Co-N-C-0.4 catalyst with different loading amount. (in O<sub>2</sub> saturated 0.1 M KOH solution at a rotation rate of 1600 rpm)

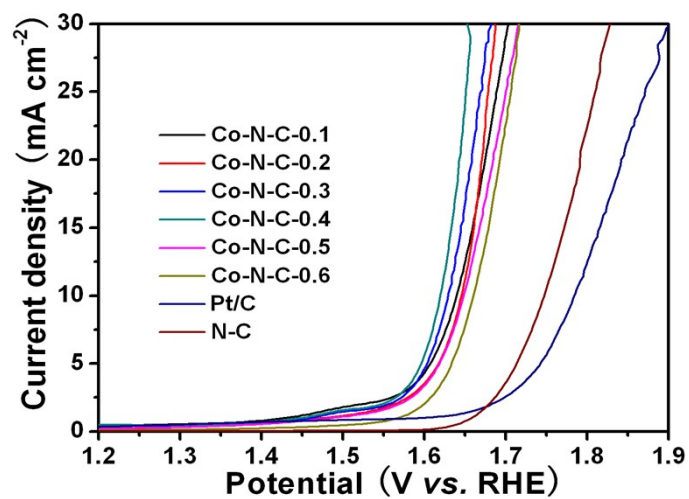

**Fig. S18** LSV results of the as-prepared catalyst. (in O<sub>2</sub> saturated 0.1 M KOH solution at a rotation rate of 1600 rpm)

**Table S1** Comparison of various carbon based materials for ORR.

| Catalysts                                | Loading<br>( $\text{mg cm}^{-2}$ ) | Onset<br>potential (V) | Half-wave<br>potential (V) | n    | References                                                   |
|------------------------------------------|------------------------------------|------------------------|----------------------------|------|--------------------------------------------------------------|
| N/Co-doped PCP//NRGO                     | 0.714                              | 0.97                   | 0.86                       | 3.9  | <i>Adv. Funct. Mater.</i><br><b>2015</b> , 25, 872           |
| N/Co-doped PCP-RGO                       | 0.714                              | 0.94                   | N/A                        | 3.3  | <i>Adv. Funct. Mater.</i><br><b>2015</b> , 25, 872           |
| $\text{Fe}_3\text{C}/\text{C}$           | 0.6                                | 1.05                   | 0.83                       | 3.9  | <i>Angew. Chem. Int. Ed.</i><br><b>2014</b> , 53, 3675       |
| $\text{FeN}_x/\text{C}$ catalyst         | 0.6                                | 0.94                   | 0.82                       | N/A  | <i>J. Am. Chem. Soc.</i><br><b>2014</b> , 136, 10882         |
| $\text{Co}_3\text{O}_4/\text{N-rmGO}$    | 0.17                               | 0.88                   | 0.83                       | 3.9  | <i>Nat. Mater.</i><br><b>2011</b> , 10, 780                  |
| Co@NG                                    | 1.08                               | 0.9                    | 0.83                       | 3.9  | <i>Adv. Funct. Mater.</i><br><b>2016</b> , 26, 4397          |
| Co/N-CNTs                                | 0.2                                | 0.94                   | 0.84                       | 3.9  | <i>J. Mater. Chem. A</i> ,<br><b>2016</b> , 4, 1694          |
| Fe/N-CNTs                                | 0.2                                | 0.96                   | 0.82                       | 3.8  | <i>J. Mater. Chem. A</i> ,<br><b>2016</b> , 4, 1694          |
| Co-N-C                                   | 0.283                              | 0.98                   | 0.87                       | 4.0  | <i>ACS Catal.</i><br><b>2015</b> , 5, 7068                   |
| Fe-N-CC                                  | 0.1                                | 0.94                   | 0.83                       | 3.7  | <i>ACS Nano</i> ,<br><b>2016</b> , 10, 5922                  |
| LDH@ZIF-67-800                           | 0.2                                | 0.94                   | 0.83                       | 4.0  | <i>Adv. Mater.</i><br><b>2016</b> , 28, 2337                 |
| Co@ $\text{Co}_3\text{O}_4$ @C-CM        | 0.1                                | 0.93                   | 0.81                       | 3.8  | <i>Energy Environ. Sci.</i><br><b>2015</b> , 8, 568          |
| N-Carbon nanotube<br>frameworks          | 0.2                                | 0.97                   | 0.87                       | 3.97 | <i>Nat. Energy.</i><br><b>2016</b> , 1, 15006.               |
| N,P-codoped ordered<br>mesoporous carbon | 0.3                                | 0.95                   | 0.82                       | 3.7  | <i>Angew. Chem. Int. Ed.</i><br><b>2015</b> , 54, 9230       |
| $\text{Co}_x\text{Zn}_{100-x}$ -NPCs     | 0.1                                | 0.9                    | N/A                        | 3.9  | <i>ACS Appl. Mater. Interfaces.</i><br><b>2015</b> , 7, 4048 |
| Co-N-C                                   | 0.25                               | 0.98                   | 0.84                       | 3.9  | This work                                                    |

**Table S2** Comparison of various carbon based materials for OER.

| Catalysts                                         | Loading<br>(mg cm <sup>-2</sup> ) | Onset<br>Potential (V) | Tafel<br>(mV decade <sup>-1</sup> ) | Potential<br>(V) @ 10<br>mA cm <sup>-2</sup> | References                                               |
|---------------------------------------------------|-----------------------------------|------------------------|-------------------------------------|----------------------------------------------|----------------------------------------------------------|
| N/Co-doped<br>MOF derived<br>carbon/NRGO          | 0.36                              | N/A                    | 292                                 | 1.66                                         | <i>Adv. Funct. Mater.</i><br><b>2015</b> , 25, 872       |
| ZIF-derived<br>carbon                             | 0.36                              | N/A                    | 393                                 | 1.75                                         | <i>Adv. Funct. Mater.</i><br><b>2015</b> , 25, 872       |
| Ni-Co mixed<br>oxide porous<br>cubes              | N/A                               | N/A                    | 59                                  | 1.66                                         | <i>Adv. Mater.</i><br><b>2016</b> , 28, 4601             |
| Mn <sub>3</sub> O <sub>4</sub> /CoSe <sub>2</sub> | 0.2                               | N/A                    | 49                                  | 1.68                                         | <i>J. Am. Chem. Soc.</i><br><b>2012</b> , 134, 2930      |
| N-<br>CNT/graphen<br>e                            | 0.24                              | 1.52                   | 82                                  | 1.63                                         | <i>Small</i> <b>2014</b> , 10, 2251                      |
| N, O-dual<br>dopedCNTs                            | 1.75                              | 1.55                   | 141                                 | 1.8 @ 14.8<br>mA cm <sup>-2</sup>            | <i>Adv. Mater.</i><br><b>2014</b> , 26, 2925             |
| N-Carbon<br>nanotube<br>frameworks                | 0.2                               | 1.47                   | 93                                  | 1.60                                         | <i>Nat. Energy.</i><br><b>2016</b> , 1, 15006.           |
| Co(OH) <sub>2</sub>                               | 0.1                               | N/A                    | 62                                  | 1.68                                         | <i>ACS Appl. Mater.<br/>Interfaces</i> 2015, 7,<br>12930 |
| Co-N-C                                            | 0.4                               | 1.55                   | 110                                 | 1.62                                         | This work                                                |
